# Supplementary material for: Down-shifting and upconversion photoluminescence in Ho3+/Yb3+ codoped GdNbO4: effect of the Bi3+ ion and the magnetic field
Source: Royal Society of Chemistry journal article supplement (doi:10.1039/c4dt01864h), 2014-01-01
Supplement: c4dt01864h1.pdf [file c4dt01864h1.pdf]

*Supporting Information*

**Down-shifting and upconversion photoluminescence in Ho<sup>3+</sup>/Yb<sup>3+</sup> co-doped GdNbO<sub>4</sub>: effect of Bi<sup>3+</sup> ion and magnetic field**

A. Dwivedi<sup>1</sup>, A.K. Singh<sup>1,2,\*</sup>, S.B. Rai<sup>1</sup>

<sup>1</sup>Department of Physics, Banaras Hindu University, Varanasi-221005, India

<sup>2</sup>Instituto de Ciencias Físicas, Universidad Nacional Autónoma de México, Cuernavaca, Morelos 62210, México

**Keywords:** Upconversion, GdNbO<sub>4</sub>, optical bistability, photoluminescence, charge-transfer band

---

\*Corresponding author: Email: akhilesh\_singh343@yahoo.com

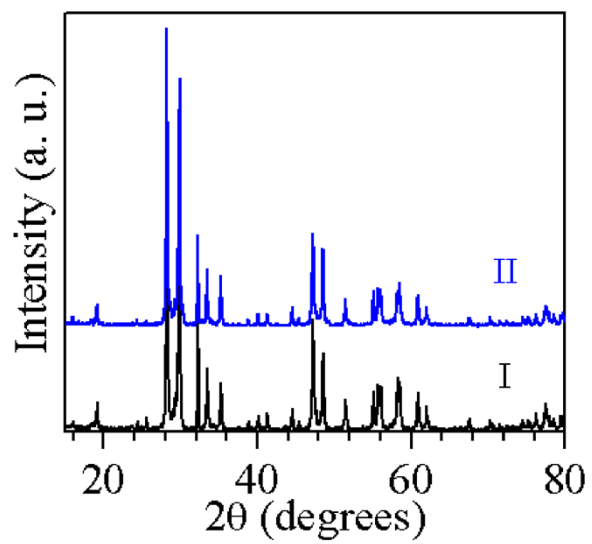

**Figure S1:** XRD pattern of: (I)  $\text{GdNbO}_4$  and (II)  $\text{Gd}_{0.93}\text{Ho}_{0.02}\text{Yb}_{0.05}\text{NbO}_4$  phosphors.
